# Supplementary material for: Identification of Pathogenic Fusarium spp. Causing Maize Ear Rot and Potential Mycotoxin Production in China
Source: PubMed Central journal article supplement (PMC4926152; doi:10.3390/toxins8060186), 2016-06-21
Supplement: toxins-08-00186-s001.pdf [file toxins-08-00186-s001.pdf]

# Supplementary Materials: Identification of Pathogenic *Fusarium* spp. Causing Maize Ear Rot and Potential Mycotoxin Production in China

Canxing Duan, Zihui Qin, Zhihuan Yang, Weixi Li, Suli Sun, Zhendong Zhu and Xiaoming Wang

|                  |                                                                  |    |
|------------------|------------------------------------------------------------------|----|
| AF212436.1_Fusar | TCGTCGTCATCGGCCACGTGCGACTCTGGCAAGTCCGACCCTG                      | 42 |
| AF212444.1_Fusar | TCGTCGTCATCGGCCACGTGCGACTCTGGCAAGTCCGACCCTG                      | 42 |
| AJ543588.1_Fusar | TCGTCGTCATCGGCCACGTGCGACTCTGGCAAGTCCGACCCTG                      | 42 |
| FG-010           | GGACAAGACTCACCTTAACGTCGTCGTCATCGGCCACGTGCGACTCTGGCAAGTCCGACCCTG  | 62 |
| FG-015           | GACAAGACTCACCTTAACGTCGTCGTCATCGGCCACGTGCGACTCTGGCAAGTCCGACCCTG   | 61 |
| FG-017           | GTCGTCATCGGCCACGTGCGACTCTGGCAAGTCCGACCCTG                        | 40 |
| FG-019           | CAAGACTCACCTTAACGTCGTCGTCATCGGCCACGTGCGACTCTGGCAAGTCCGACCCTG     | 59 |
| FG-020           | AAGACTCACCTTAACGTCGTCGTCATCGGCCACGTGCGACTCTGGCAAGTCCGACCCTG      | 58 |
| FG-029           | AAGACTCACCTTAACGTCGTCGTCATCGGCCACGTGCGACTCTGGCAAGTCCGACCCTG      | 58 |
| FG-030           | AAGACTCACCTTAACGTCGTCGTCATCGGCCACGTGCGACTCTGGCAAGTCCGACCCTG      | 58 |
| FG-039           | AGGACAAGACTCACCTTAACGTCGTCGTCATCGGCCACGTGCGACTCTGGCAAGTCCGACCCTG | 63 |
| FG-043           | GAAGACTCACCTTAACGTCGTCGTCATCGGCCACGTGCGACTCTGGCAAGTCCGACCCTG     | 56 |
| FG-044           | AGACTCACCTTAACGTCGTCGTCATCGGCCACGTGCGACTCTGGCAAGTCCGACCCTG       | 57 |
| FG-057           | CAAGACTCACCTTAACGTCGTCGTCATCGGCCACGTGCGACTCTGGCAAGTCCGACCCTG     | 59 |
| FG-078           | CAAGACTCACCTTAACGTCGTCGTCATCGGCCACGTGCGACTCTGGCAAGTCCGACCCTG     | 59 |
| FG-080           | AAGACTCACCTTAACGTCGTCGTCATCGGCCACGTGCGACTCTGGCAAGTCCGACCCTG      | 58 |
| FG-082           | AGGACAAGACTCACCTTAACGTCGTCGTCATCGGCCACGTGCGACTCTGGCAAGTCCGACCCTG | 63 |
| FG-086           | AAGACTCACCTTAACGTCGTCGTCATCGGCCACGTGCGACTCTGGCAAGTCCGACCCTG      | 58 |
| FG-087           | AGACTCACCTTAACGTCGTCGTCATCGGCCACGTGCGACTCTGGCAAGTCCGACCCTG       | 57 |
| FG-092           | AAGACTCACCTTAACGTCGTCGTCATCGGCCACGTGCGACTCTGGCAAGTCCGACCCTG      | 58 |
| FG-094           | AGACTCACCTTAACGTCGTCGTCATCGGCCACGTGCGACTCTGGCAAGTCCGACCCTG       | 57 |
| FG-096           | AGGACAAGACTCACCTTAACGTCGTCGTCATCGGCCACGTGCGACTCTGGCAAGTCCGACCCTG | 63 |
| FG-098           | AAGACTCACCTTAACGTCGTCGTCATCGGCCACGTGCGACTCTGGCAAGTCCGACCCTG      | 58 |
| FG-100           | AAGACTCACCTTAACGTCGTCGTCATCGGCCACGTGCGACTCTGGCAAGTCCGACCCTG      | 58 |
| FG-102           | CAAGACTCACCTTAACGTCGTCGTCATCGGCCACGTGCGACTCTGGCAAGTCCGACCCTG     | 59 |
| FG-103           | CAAGACTCACCTTAACGTCGTCGTCATCGGCCACGTGCGACTCTGGCAAGTCCGACCCTG     | 59 |
| FG-104           | TCATCGGCCACGTGCGACTCTGGCAAGTCCGACCCTG                            | 36 |
| FG-106           | AGGACAAGACTCACCTTAACGTCGTCGTCATCGGCCACGTGCGACTCTGGCAAGTCCGACCCTG | 63 |
| FG-107           | GGACAAGACTCACCTTAACGTCGTCGTCATCGGCCACGTGCGACTCTGGCAAGTCCGACCCTG  | 62 |
| FG-128           | AGTCCGACCCTG                                                     | 12 |
| FG-129           | GGACAAGACTCACCTTAACGTCGTCGTCATCGGCCACGTGCGACTCTGGCAAGTCCGACCCTG  | 62 |
| FG-130           | AAGACTCACCTTAACGTCGTCGTCATCGGCCACGTGCGACTCTGGCAAGTCCGACCCTG      | 58 |
| FG-135           | CAAGACTCACCTTAACGTCGTCGTCATCGGCCACGTGCGACTCTGGCAAGTCCGACCCTG     | 59 |

|                  |                                                                   |     |
|------------------|-------------------------------------------------------------------|-----|
| AF212436.1_Fusar | TCAGTACCACCGCATCCCAACCCGCGCCGACACTTGGCGGGGCTAGTTTCAAATTTCCAACGTTG | 104 |
| AF212444.1_Fusar | TCAGTACCACCGCATCCCAACCCGCGCCGACACTTGGCGGGGCTAGTTTCAAATTTCCAATGTTG | 105 |
| AJ543588.1_Fusar | TCAGTACCACCGCATCCCAACCCGCGCCGACACTTGGCGGGGCTAGTTTCAAATTTCCAATGTTG | 104 |
| FG-010           | TCAGTACCACCGCATCCCAACCCGCGCCGACACTTGGCGGGGCTAGTTTCAAATTTCCAATGTTG | 125 |
| FG-015           | TCAGTACCACCGCATCCCAACCCGCGCCGACACTTGGCGGGGCTAGTTTCAAATTTCCAACGTTG | 123 |
| FG-017           | TCAGTACCACCGCATCCCAACCCGCGCCGACACTTGGCGGGGCTAGTTTCAAATTTCCAACGTTG | 102 |
| FG-019           | TCAGTACCACCGCATCCCAACCCGCGCCGACACTTGGCGGGGCTAGTTTCAAATTTCCAACGTTG | 121 |
| FG-020           | TCAGTACCACCGCATCCCAACCCGCGCCGACACTTGGCGGGGCTAGTTTCAAATTTCCAACGTTG | 120 |
| FG-029           | TCAGTACCACCGCATCCCAACCCGCGCCGACACTTGGCGGGGCTAGTTTCAAATTTCCAATGTTG | 120 |
| FG-030           | TCAGTACCACCGCATCCCAACCCGCGCCGACACTTGGCGGGGCTAGTTTCAAATTTCCAATGTTG | 120 |
| FG-039           | TCAGTACCACCGCATCCCAACCCGCGCCGACACTTGGCGGGGCTAGTTTCAAATTTCCAATGTTG | 125 |
| FG-043           | TCAGTACCACCGCATCCCAACCCGCGCCGACACTTGGCGGGGCTAGTTTCAAATTTCCAATGTTG | 118 |
| FG-044           | TCAGTACCACCGCATCCCAACCCGCGCCGACACTTGGCGGGGCTAGTTTCAAATTTCCAATGTTG | 119 |
| FG-057           | TCAGTACCACCGCATCCCAACCCGCGCCGACACTTGGCGGGGCTAGTTTCAAATTTCCAATGTTG | 122 |
| FG-078           | TCAGTACCACCGCATCCCAACCCGCGCCGACACTTGGCGGGGCTAGTTTCAAATTTCCAATGTTG | 121 |
| FG-080           | TCAGTACCACCGCATCCCAACCCGCGCCGACACTTGGCGGGGCTAGTTTCAAATTTCCAATGTTG | 120 |
| FG-082           | TCAGTACCACCGCATCCCAACCCGCGCCGACACTTGGCGGGGCTAGTTTCAAATTTCCAATGTTG | 125 |
| FG-086           | TCAGTACCACCGCATCCCAACCCGCGCCGACACTTGGCGGGGCTAGTTTCAAATTTCCAATGTTG | 120 |
| FG-087           | TCAGTACCACCGCATCCCAACCCGCGCCGACACTTGGCGGGGCTAGTTTCAAATTTCCAATGTTG | 119 |
| FG-092           | TCAGTACCACCGCATCCCAACCCGCGCCGACACTTGGCGGGGCTAGTTTCAAATTTCCAATGTTG | 121 |
| FG-094           | TCAGTACCACCGCATCCCAACCCGCGCCGACACTTGGCGGGGCTAGTTTCAAATTTCCAATGTTG | 120 |
| FG-096           | TCAGTACCACCGCATCCCAACCCGCGCCGACACTTGGCGGGGCTAGTTTCAAATTTCCAATGTTG | 125 |
| FG-098           | TCAGTACCACCGCATCCCAACCCGCGCCGACACTTGGCGGGGCTAGTTTCAAATTTCCAATGTTG | 120 |
| FG-100           | TCAGTACCACCGCATCCCAACCCGCGCCGACACTTGGCGGGGCTAGTTTCAAATTTCCAACGTTG | 120 |
| FG-102           | TCAGTACCACCGCATCCCAACCCGCGCCGACACTTGGCGGGGCTAGTTTCAAATTTCCAACGTTG | 121 |
| FG-103           | TCAGTACCACCGCATCCCAACCCGCGCCGACACTTGGCGGGGCTAGTTTCAAATTTCCAATGTTG | 121 |
| FG-104           | TCAGTACCACCGCATCCCAACCCGCGCCGACACTTGGCGGGGCTAGTTTCAAATTTCCAACGTTG | 98  |
| FG-106           | TCAGTACCACCGCATCCCAACCCGCGCCGACACTTGGCGGGGCTAGTTTCAAATTTCCAACGTTG | 125 |
| FG-107           | TCAGTACCACCGCATCCCAACCCGCGCCGACACTTGGCGGGGCTAGTTTCAAATTTCCAACGTTG | 124 |
| FG-128           | TCAGTACCACCGCATCCCAACCCGCGCCGACACTTGGCGGGGCTAGTTTCAAATTTCCAACGTTG | 74  |
| FG-129           | TCAGTACCACCGCATCCCAACCCGCGCCGACACTTGGCGGGGCTAGTTTCAAATTTCCAACGTTG | 124 |
| FG-130           | TCAGTACCACCGCATCCCAACCCGCGCCGACACTTGGCGGGGCTAGTTTCAAATTTCCAACGTTG | 120 |
| FG-135           | TCAGTACCACCGCATCCCAACCCGCGCCGACACTTGGCGGGGCTAGTTTCAAATTTCCAATGTTG | 121 |







|                  |                                                                  |     |
|------------------|------------------------------------------------------------------|-----|
| AF212436.1_Fusar | TACTAACATGGCTATCAGACGCTCCCGGTCACCGTG                             | 644 |
| AF212444.1_Fusar | TACTAACATGGCTCTCAGACGCTCCCGGTCACCGTG                             | 644 |
| AJ543588.1_Fusar | TACTAACATGGCTATCAGACGCTCCCGGTCACCGTG                             | 644 |
| FG-010           | TACTAACATGGCTCTCAGACGCTCCCGGTCACCGTGATTTTCATCAAGAACATGA          | 682 |
| FG-015           | TACTAACATGGCTATCAGACGCTCCCGGTCACCGTGATTTTCATCAAGAACATG           | 680 |
| FG-017           | TACTAAC                                                          | 613 |
| FG-019           | TACTAACATGGCTATCAGACGCTCCCGGTCACCGTGATTTTCATCAAGAACATGAT         | 680 |
| FG-020           | TACTAACATGGCTATCAGACGCTCCCGGTCACCGTGATTTTCATCAAGAACATGA          | 678 |
| FG-029           | TACTAACATGGCTATCAGACGCTCCCGGTCACCGTGATTTTCATCAAGAACATGAT         | 678 |
| FG-030           | TACTAACATGGCTATCAGACGCTCCCGGTCACCGTGATTTTCATCAAGAACATGAT         | 678 |
| FG-039           | TACTAACATGGCTATCAGACGCTCCCGGTCACCGTGATTTTCATCAAGAACATGAT         | 684 |
| FG-043           | TACTAACATGGCTATCAGACGCTCCCGGTCACCGTGATTTTCATCAAGAACATGA          | 675 |
| FG-044           | TACTAACATGGCTATCAGACGCTCCCGGTCACCGTGATTTTCATCAAGAACATGAT         | 677 |
| FG-057           | TACTAACATGGCTCTCAGACGCTCCCGGTCACCGTGATTTTCATCAAGAACATG           | 678 |
| FG-078           | TACTAACATGGCTATCAGACGCTCCCGGTCACCGTGATTTTCATCAAGAACATGA          | 678 |
| FG-080           | TACTAACATGGCTATCAGACGCTCCCGGTCACCGTGATTTTCATCAAGAACATGAT         | 678 |
| FG-082           | TACTAACATGGCTATCAGACGCTCCCGGTCACCGTGATTTTCATCAAGAACATGAT         | 683 |
| FG-086           | TACTAACATGGCTATCAGACGCTCCCGGTCACCGTGATTTTCATCAAGAACATGA          | 678 |
| FG-087           | TACTAACATGGCTATCAGACGCTCCCGGTCACCGTGATTTTCATCAAGAACATGAT         | 677 |
| FG-092           | TACTAACATGGCTCTCAGACGCTCCCGGTCACCGTGATTTTCATCAAGAACATG           | 677 |
| FG-094           | TACTAACATGGCTCTCAGACGCTCCCGGTCACCGTGATTTTCATCAAGAACATGA          | 677 |
| FG-096           | TACTAACATGGCTATCAGACGCTCCCGGTCACCGTGATTTTCATCAAGAACATGA          | 682 |
| FG-098           | TACTAACATGGCTATCAGACGCTCCCGGTCACCGTGATTTTCATCAAGAACATGA          | 677 |
| FG-100           | TACTAACATGGCTATCAGACGCTCCCGGTCACCGTGATTTTCATCAAGAACATGAT         | 679 |
| FG-102           | TACTAACATGGCTATCAGACGCTCCCGGTCACCGTGATTTTCATCAAGAACATGA          | 679 |
| FG-103           | TACTAACATGGCTATCAGACGCTCCCGGTCACCGTGATTTTCATCAAGAACATGAT         | 680 |
| FG-104           | TACTAACATGGCTATCAGACGCTCCCGGTCACCGTGATTTTCATCAAGAACATGA          | 656 |
| FG-106           | TACTAACATGGCTATCAGACGCTCCCGGTCACCGTGATTTTCATCAAGAACATGAT         | 684 |
| FG-107           | TACTAACATGGCTATCAGACGCTCCCGGTCACCGTGATTTTCATCAAGAACATGATC        | 684 |
| FG-128           | TACTAACATGGCTATCAGACGCTCCCGGTCACCGTGATTTTCATCAAGAACATGATCACTGGTA | 641 |
| FG-129           | TACTAACATGGCTATCAGACGCTCCCGGTCACCGTGATTTTCATCAAGAACATGA          | 682 |
| FG-130           | TACTAACATGGCTATCAGACGCTCCCGGTCACCGTGATTTTCATCAAGAACA             | 675 |
| FG-135           | TACTAACATGGCTATCAGACGCTCCCGGTCACCGTGATTTTCATCAAGAACATGATC        | 681 |
|                  |                                                                  |     |
| AF212436.1_Fusar |                                                                  |     |
| AF212444.1_Fusar |                                                                  |     |
| AJ543588.1_Fusar |                                                                  |     |
| FG-010           |                                                                  |     |
| FG-015           |                                                                  |     |
| FG-017           |                                                                  |     |
| FG-019           |                                                                  |     |
| FG-020           |                                                                  |     |
| FG-029           |                                                                  |     |
| FG-030           |                                                                  |     |
| FG-039           |                                                                  |     |
| FG-043           |                                                                  |     |
| FG-044           |                                                                  |     |
| FG-057           |                                                                  |     |
| FG-078           |                                                                  |     |
| FG-080           |                                                                  |     |
| FG-082           |                                                                  |     |
| FG-086           |                                                                  |     |
| FG-087           |                                                                  |     |
| FG-092           |                                                                  |     |
| FG-094           |                                                                  |     |
| FG-096           |                                                                  |     |
| FG-098           |                                                                  |     |
| FG-100           |                                                                  |     |
| FG-102           |                                                                  |     |
| FG-103           |                                                                  |     |
| FG-104           |                                                                  |     |
| FG-106           |                                                                  |     |
| FG-107           |                                                                  |     |
| FG-128           | CT                                                               | 643 |
| FG-129           |                                                                  |     |
| FG-130           |                                                                  |     |
| FG-135           |                                                                  |     |

Figure S1: The alignments of *TEF-1α* gene sequences of FGSC isolates and standard reference strains. Blue color means the consensus of sequences.
